# Supplementary material for: A General Approach for Haplotype Phasing across the Full Spectrum of Relatedness
Source: PubMed Central journal article supplement (PMC3990520; doi:10.1371/journal.pgen.1004234), 2014-04-17
Supplement: pgen.1004234.s035.pdf [file pgen.1004234.s035.pdf]

| Cohort | Total | Pedigree Size |     |     |    |    |   |   |          | Founders | Unrelated |
|--------|-------|---------------|-----|-----|----|----|---|---|----------|----------|-----------|
|        |       | 1             | 2   | 3   | 4  | 5  | 6 | 7 | $\geq 8$ |          |           |
| CARL   | 630   | 327           | 35  | 26  | 15 | 6  | 2 | 1 | 5        | 130      | 457       |
| FVG    | 1236  | 612           | 65  | 61  | 20 | 9  | 7 | 4 | 11       | 274      | 886       |
| GPC    | 2676  | 1712          | 156 | 107 | 48 | 19 | 5 | 2 | 0        | 419      | 2131      |
| KOR    | 897   | 661           | 50  | 26  | 8  | 1  | 1 | 1 | 1        | 118      | 779       |
| ORC    | 889   | 439           | 64  | 51  | 20 | 7  | 3 | 1 | 3        | 201      | 640       |
| SPL    | 500   | 404           | 25  | 14  | 1  | 0  | 0 | 0 | 0        | 50       | 454       |
| VB     | 1664  | 590           | 142 | 127 | 54 | 14 | 9 | 5 | 4        | 481      | 1071      |
| VIS    | 960   | 653           | 67  | 28  | 11 | 4  | 3 | 1 | 0        | 150      | 803       |
