# Supplementary material for: A General Approach for Haplotype Phasing across the Full Spectrum of Relatedness
Source: PubMed Central journal article supplement (PMC3990520; doi:10.1371/journal.pgen.1004234), 2014-04-17
Supplement: pgen.1004234.s036.pdf [file pgen.1004234.s036.pdf]

|               |    | Observed genotype |          |          |         |
|---------------|----|-------------------|----------|----------|---------|
|               |    | AA                | AB       | BB       | Missing |
| True genotype | AA | 99.69100          | 0.04764  | 0.01286  | 0.24850 |
|               | AB | 0.24437           | 99.35964 | 0.12842  | 0.26757 |
|               | BB | 0.04536           | 0.11429  | 99.56244 | 0.27791 |
