# Supplementary material for: A General Approach for Haplotype Phasing across the Full Spectrum of Relatedness
Source: PubMed Central journal article supplement (PMC3990520; doi:10.1371/journal.pgen.1004234), 2014-04-17
Supplement: pgen.1004234.s037.pdf [file pgen.1004234.s037.pdf]

|      | SHAPEIT2 |       |       | Beagle |       |       | HAPI-UR 3X |        |       |
|------|----------|-------|-------|--------|-------|-------|------------|--------|-------|
|      | P        | M     | C     | P      | M     | C     | P          | M      | C     |
| CARL | 0.010    | 0.058 | 0.010 | 1.505  | 2.507 | 0.828 | 3.461      | 5.491  | 1.576 |
| FVG  | 0.040    | 0.134 | 0.028 | 3.248  | 3.629 | 2.203 | 5.936      | 8.224  | 3.818 |
| GPC  | 0.118    | 0.291 | 0.096 | 0.893  | 1.769 | 0.646 | 1.216      | 2.442  | 0.917 |
| KOR  | 0.156    | 0.427 | 0.078 | 4.516  | 5.967 | 3.368 | 10.305     | 14.314 | 6.473 |
| ORC  | 0.045    | 0.038 | 0.008 | 1.816  | 1.426 | 0.531 | 6.022      | 5.201  | 2.490 |
| SPL  | 0.010    | 0.103 | 0.008 | 1.447  | 3.350 | 0.651 | 2.645      | 6.667  | 1.331 |
| VB   | 0.076    | 0.143 | 0.019 | 2.900  | 4.367 | 1.176 | 6.127      | 9.112  | 2.373 |
| VIS  | 0.058    | 0.200 | 0.006 | 4.378  | 7.326 | 1.092 | 7.264      | 12.404 | 1.990 |
